# Supplementary material for: Antagonistic Effects of IL-4 on IL-17A-Mediated Enhancement of Epidermal Tight Junction Function
Source: MDPI journal article supplement (doi:10.3390/ijms20174070), 2019-08-21
Supplement: s1 [file s1]

Supplementary Figure 1

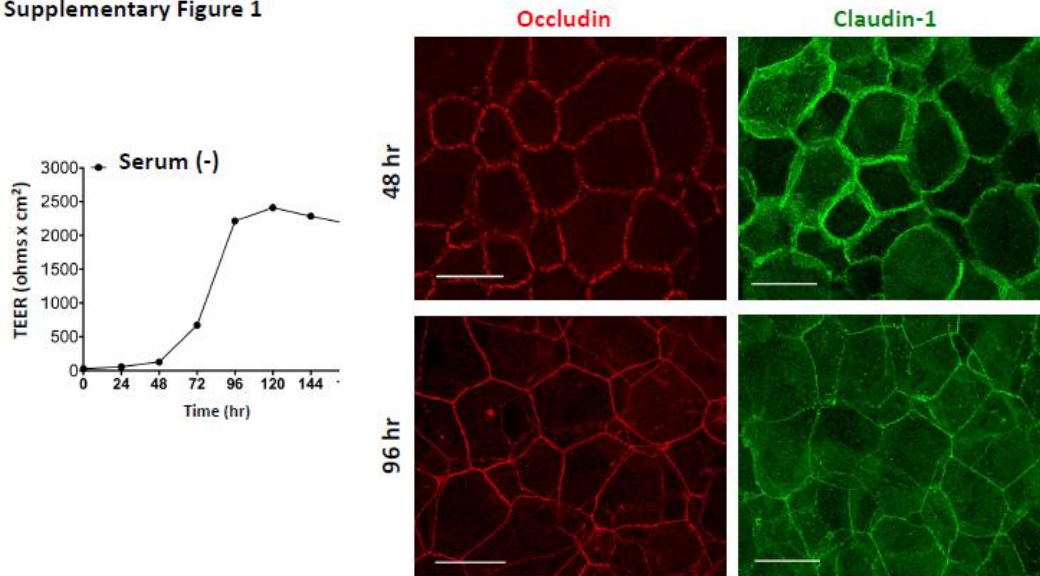

**Figure S1.** PHK differentiated in high calcium containing media depleted of bovine serum or growth factors (serum -) form a barrier to ion flux, as measured by increased TEER, that peaks around 96 hours post differentiation. Representative immunostaining of Occludin (red) and CLDN1 (green) in PHK cultured in serum (-) at 48 h and 96 h post differentiation showing the maturation of a characteristic TJ “chicken wire” pattern. Scale bar = 40  $\mu$ m.

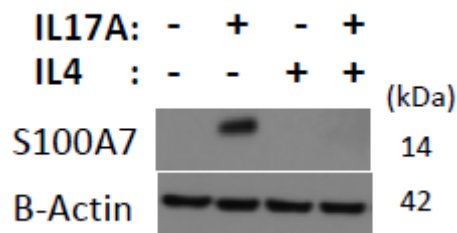

**Figure S2.** IL-4 blocks IL-17A induced S100A7 expression in PHK. A representative Western blot is shown ( $n = 3$  experiments).

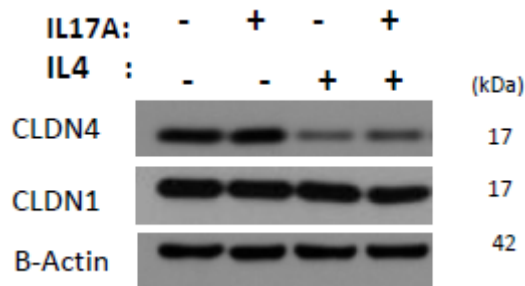

**Figure S3.** CLDN4 expression is reduced by IL-4 treatment in both media alone and IL-17A treated PHK in the submerged culture model. No changes were observed in CLDN1 expression. A representative western blot is shown.
